# Supplementary material
Source: MDPI journal article supplement (https://www.mdpi.com/2072-4292/10/2/215)
Supplement: s1 [file s1]

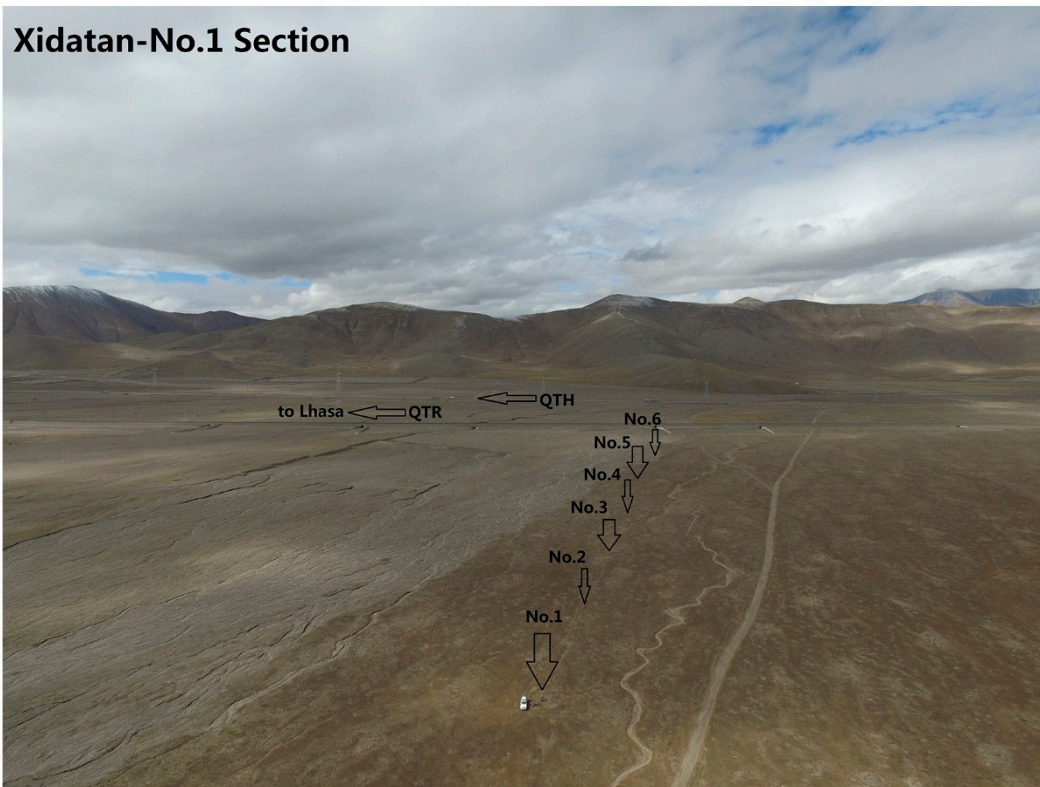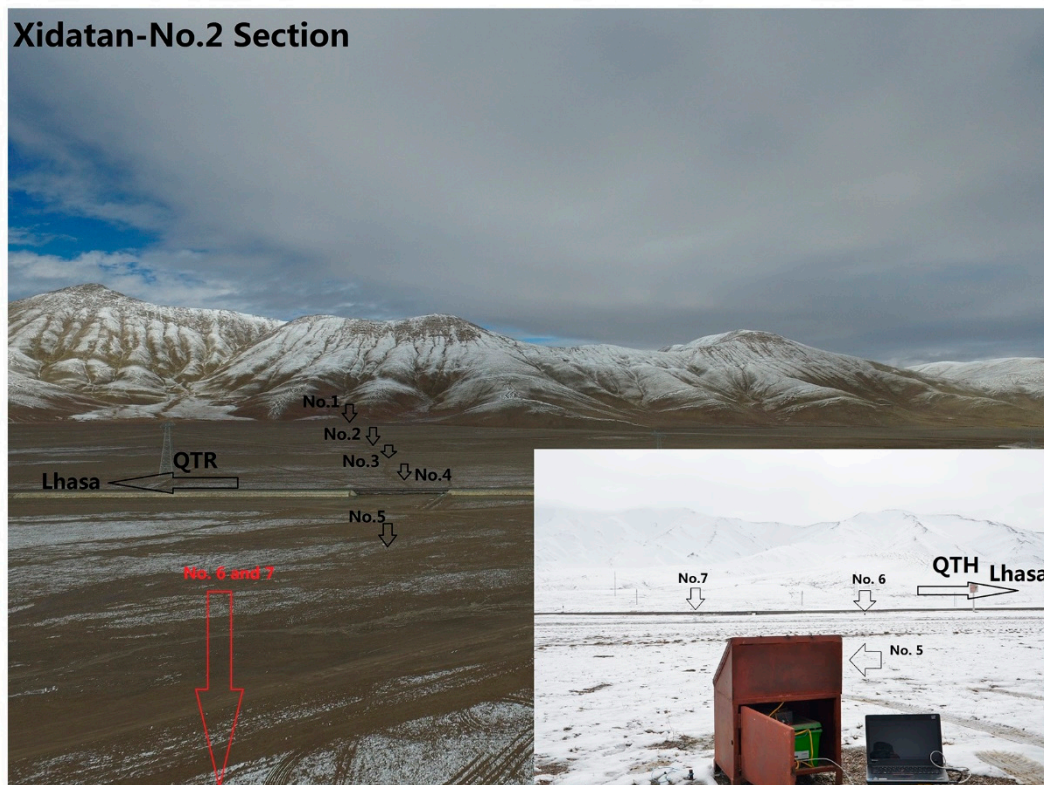

**Figure S1.** Photo of the thermal borehole distribution for permafrost investigation in Xidatan. The results have been submitted to Journal of Mountain Science by Luo et al. (2017). Photo taken on 24 September 2017 by Guoan Yin.

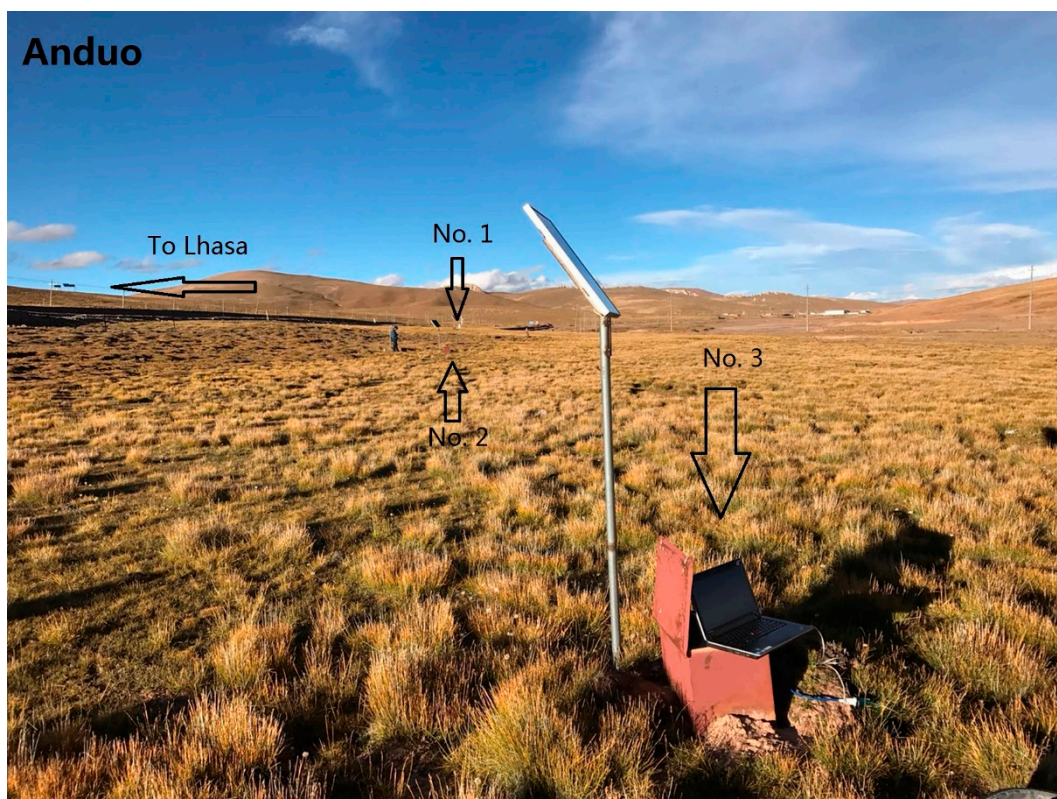

**Figure S2.** Photo of the thermal borehole distribution for permafrost investigation in Anduo. Photo taken on 17 September 2017 by Guoan Yin.
